# Supplementary material
Source: PubMed Central journal article supplement (PMC8404983)
Supplement: mmc1.pdf [file mmc1.pdf]

**Autoimmune hepatitis following COVID-19 Vaccination: true  
causality or mere association?**

Chin King Tan, Yu Jun Wong, Lai Mun Wang, Tiing Leong Ang, Rahul Kumar

Table of contents

Table S1.....2  
Table S2.....2

**Table S1. Trend of liver function test\***

| Date                             | Normal Range | 11-Feb-2013 | 24-May-2021 | 26-May-2021 | 28-May-2021 | 31-May-2021 | 01-Jun-2021 | 03-Jun-2021 | 07-Jun-2021 |
|----------------------------------|--------------|-------------|-------------|-------------|-------------|-------------|-------------|-------------|-------------|
| Bilirubin ( $\mu\text{mol/L}$ )  | 5-30         | 15          | 87          | 105         | 79          | 53          | 46          | 34          | 20          |
| Alkaline phosphatase (U/L)       | 32-103       | 60          | 252         | 298         | 260         | 248         | 207         | 203         | 177         |
| Alanine aminotransferase (U/L)   | 10-55        | 24          | 1417        | 1701        | 1470        | 1337        | 1032        | 885         | 471         |
| Aspartate aminotransferase (U/L) | 10-45        | 30          | 890         | 1124        | 850         | 690         | 606         | 430         | 130         |

\*Liver biopsy was performed on 01/06/2021 and Budesonide was started on 02/06/2021.

**Table S2. Other relevant investigations**

| Date        | Investigation               | Results      |
|-------------|-----------------------------|--------------|
| 24-May 2021 | Hepatitis A IgM             | Non-reactive |
| 24-May 2021 | Hepatitis B surface Antigen | Non-reactive |
| 24-May 2021 | Hepatitis B core Antibody   | Not detected |

|             |                                   |                                                  |
|-------------|-----------------------------------|--------------------------------------------------|
| 24-May 2021 | Hepatitis C Antibody Screen (EIA) | Non-reactive                                     |
| 24-May 2021 | Hepatitis E IgM Antibody          | Non-reactive                                     |
| 27-May 2021 | Cytomegalovirus PCR               | Not detected                                     |
| 27-May 2021 | Ebstein-Barr Virus PCR            | Not detected                                     |
| 27-May 2021 | Herpes Simplex Virus IgM          | Negative                                         |
| 27-May 2021 | Varicella Zoster Virus IgM        | Negative                                         |
| 27-May 2021 | Antinuclear antibody titre        | 1:640 (homogenous pattern)                       |
| 27-May 2021 | Anti-smooth muscle antibody       | 1: 320                                           |
| 27-May 2021 | Immunoglobulin G                  | 32.6 G/L                                         |
| 25-May 2021 | CT Scan of Abdomen                | Liver parenchyma normal. No biliary obstruction. |

CT: Computerise Tomography ; G/L: Gram per Litre; IgM: Immunoglobulin M; PCR: Polymerase Chain Reaction.
